# Supplementary material for: Combined quantum mechanics/molecular mechanics (QM/MM) methods to understand the charge density distribution of estrogens in the active site of estrogen receptors
Source: Royal Society of Chemistry journal article supplement (doi:10.1039/c9ra08607b), 2019-01-01
Supplement: c9ra08607b1.pdf [file c9ra08607b1.pdf]

Table S1: The geometrical parameters of estrogens in gas phase, active site and the QM/MM minimized structure calculated at B3LYP/6-311G\*\* level of theory.

| Bonds       | Estrone |         |       | Bonds       | 17 $\beta$ -estradiol |         |       | Bonds       | Estriol |         |       |
|-------------|---------|---------|-------|-------------|-----------------------|---------|-------|-------------|---------|---------|-------|
|             | GP      | Docking | QM/MM |             | GP                    | Docking | QM/MM |             | GP      | Docking | QM/MM |
| C(2)–C(1)   | 1.387   | 1.387   | 1.388 | C(2)–C(1)   | 1.387                 | 1.387   | 1.387 | C(2)–C(1)   | 1.387   | 1.386   | 1.379 |
| C(3)–C(2)   | 1.403   | 1.402   | 1.399 | C(1)–C(6)   | 1.394                 | 1.393   | 1.397 | C(3)–C(2)   | 1.403   | 1.403   | 1.403 |
| C(3)–C(4)   | 1.406   | 1.407   | 1.403 | C(3)–C(2)   | 1.403                 | 1.402   | 1.4   | C(3)–C(4)   | 1.406   | 1.405   | 1.398 |
| C(4)–C(5)   | 1.399   | 1.398   | 1.395 | C(3)–C(4)   | 1.406                 | 1.407   | 1.396 | C(4)–C(5)   | 1.399   | 1.399   | 1.395 |
| C(5)–C(6)   | 1.390   | 1.391   | 1.4   | C(4)–C(5)   | 1.399                 | 1.399   | 1.387 | C(5)–C(6)   | 1.390   | 1.39    | 1.394 |
| C(1)–C(6)   | 1.394   | 1.394   | 1.404 | C(5)–C(6)   | 1.390                 | 1.391   | 1.401 | C(1)–C(6)   | 1.394   | 1.395   | 1.405 |
| C(7)–C(3)   | 1.530   | 1.53    | 1.507 | C(7)–C(3)   | 1.530                 | 1.529   | 1.505 | C(7)–C(3)   | 1.530   | 1.529   | 1.5   |
| C(8)–C(7)   | 1.552   | 1.549   | 1.547 | C(8)–C(7)   | 1.551                 | 1.552   | 1.546 | C(8)–C(7)   | 1.551   | 1.551   | 1.543 |
| C(8)–C(9)   | 1.530   | 1.531   | 1.519 | C(7)–C(11)  | 1.546                 | 1.546   | 1.534 | C(8)–C(9)   | 1.531   | 1.531   | 1.519 |
| C(9)–C(10)  | 1.529   | 1.529   | 1.515 | C(8)–C(9)   | 1.531                 | 1.529   | 1.518 | C(9)–C(10)  | 1.529   | 1.529   | 1.517 |
| C(10)–C(4)  | 1.518   | 1.518   | 1.496 | C(9)–C(10)  | 1.529                 | 1.528   | 1.515 | C(10)–C(4)  | 1.518   | 1.517   | 1.495 |
| C(7)–C(11)  | 1.547   | 1.547   | 1.534 | C(10)–C(4)  | 1.518                 | 1.518   | 1.494 | C(7)–C(11)  | 1.546   | 1.547   | 1.531 |
| C(12)–C(11) | 1.543   | 1.542   | 1.534 | C(12)–C(11) | 1.542                 | 1.541   | 1.531 | C(12)–C(11) | 1.543   | 1.541   | 1.525 |
| C(13)–C(12) | 1.530   | 1.535   | 1.531 | C(13)–C(12) | 1.535                 | 1.537   | 1.532 | C(13)–C(12) | 1.535   | 1.535   | 1.528 |
| C(13)–C(18) | 1.551   | 1.545   | 1.53  | C(13)–C(14) | 1.549                 | 1.549   | 1.549 | C(13)–C(14) | 1.551   | 1.551   | 1.548 |
| C(14)–C(13) | 1.548   | 1.549   | 1.551 | C(13)–C(15) | 1.541                 | 1.54    | 1.559 | C(13)–C(18) | 1.543   | 1.542   | 1.53  |
| C(14)–C(8)  | 1.528   | 1.53    | 1.521 | C(13)–C(18) | 1.543                 | 1.543   | 1.53  | C(14)–C(8)  | 1.527   | 1.527   | 1.521 |
| C(14)–C(17) | 1.541   | 1.541   | 1.529 | C(14)–C(8)  | 1.528                 | 1.529   | 1.52  | C(13)–C(15) | 1.546   | 1.547   | 1.548 |
| C(13)–C(15) | 1.531   | 1.539   | 1.561 | C(14)–C(17) | 1.542                 | 1.541   | 1.527 | C(15)–C(16) | 1.541   | 1.54    | 1.567 |
| C(15)–C(16) | 1.540   | 1.554   | 1.556 | C(15)–C(16) | 1.554                 | 1.555   | 1.553 | C(17)–C(16) | 1.548   | 1.548   | 1.551 |
| C(17)–C(16) | 1.546   | 1.558   | 1.531 | C(17)–C(16) | 1.557                 | 1.558   | 1.533 | C(14)–C(17) | 1.543   | 1.544   | 1.525 |
| O(1)–C(6)   | 1.367   | 1.369   | 1.365 | O(1)–C(6)   | 1.368                 | 1.368   | 1.364 | O(1)–C(6)   | 1.367   | 1.368   | 1.362 |
| O(2)–C(15)  | 1.205   | 1.212   | 1.225 | O(2)–C(15)  | 1.424                 | 1.425   | 1.401 | O(2)–C(15)  | 1.425   | 1.426   | 1.403 |
|             |         |         |       |             |                       |         |       | O(3)–C(16)  | 1.426   | 1.426   | 1.409 |

Bond angles (°)

|                        |        |        |        |                        |        |        |        |                        |        |        |        |
|------------------------|--------|--------|--------|------------------------|--------|--------|--------|------------------------|--------|--------|--------|
| O(1)–C(6)–C(5)         | 122.9  | 122.8  | 123.1  | O(1)–C(6)–C(1)         | 117.8  | 117.7  | 117.2  | O(1)–C(6)–C(5)         | 122.9  | 122.9  | 121.1  |
| O(1)–C(6)–C(1)         | 117.7  | 117.8  | 117.1  | O(1)–C(6)–C(5)         | 122.9  | 122.8  | 122.9  | O(1)–C(6)–C(1)         | 117.8  | 117.7  | 117.9  |
| O(2)–C(15)–C(13)       | 126.5  | 111.4  | 112.8  | O(2)–C(15)–C(13)       | 111.3  | 111.4  | 111.6  | O(2)–C(15)–C(13)       | 117.3  | 117.3  | 117.3  |
| O(2)–C(15)–C(16)       | 125.5  | 114.3  | 112.2  | O(2)–C(15)–C(16)       | 114.3  | 114.3  | 112.3  | O(2)–C(15)–C(16)       | 109.1  | 109.1  | 112.4  |
|                        |        |        |        |                        |        |        |        | O(3)–C(16)–C(15)       | 112.8  | 112.8  | 114.6  |
|                        |        |        |        |                        |        |        |        | O(3)–C(16)–C(17)       | 109.9  | 109.9  | 111.1  |
| Torsion angles (°)     |        |        |        |                        |        |        |        |                        |        |        |        |
| C(2)–C(1)–C(6)–O(1)    | -179.9 | -179.9 | -179.4 | C(4)–C(5)–C(6)–O(1)    | 179.9  | 179.9  | 179.4  | C(2)–C(1)–C(6)–O(1)    | -179.8 | 179.9  | 179.5  |
| C(4)–C(5)–C(6)–O(1)    | 179.9  | 179.9  | 179.9  | C(2)–C(1)–C(6)–O(1)    | -179.9 | -179.8 | -179.8 | C(4)–C(5)–C(6)–O(1)    | 179.8  | 179.9  | 179.4  |
| C(12)–C(13)–C(15)–O(2) | 33.3   | 78     | 82.3   | C(14)–C(13)–C(15)–O(2) | -166.0 | -166   | -161.3 | C(12)–C(13)–C(15)–O(2) | 79.5   | 79.5   | 76.2   |
| C(14)–C(13)–C(15)–O(2) | 151.6  | -166   | 163.2  | C(12)–C(13)–C(15)–O(2) | 78.1   | 78.1   | 83.7   | C(14)–C(13)–C(15)–O(2) | -165.1 | -165.1 | -167.9 |
| O(2)–C(15)–C(16)–C(17) | -175.4 | 145.1  | -145.2 | C(18)–C(13)–C(15)–O(2) | -46.8  | -46.8  | -41.5  | O(2)–C(15)–C(16)–C(17) | 153.3  | 153.3  | -153.5 |
| C(18)–C(13)–C(15)–O(2) | -89.6  | -46.9  | -43.4  | O(2)–C(15)–C(16)–C(17) | 145.1  | 145.2  | 141.4  | C(18)–C(13)–C(15)–O(2) | -45.8  | -45.8  | -48.1  |
|                        |        |        |        |                        |        |        |        | C(13)–C(15)–C(16)–O(3) | 147.1  | 147.2  | 149.3  |
|                        |        |        |        |                        |        |        |        | C(14)–C(17)–C(16)–O(3) | -120.2 | -120.2 | -122.7 |
|                        |        |        |        |                        |        |        |        | O(2)–C(15)–C(16)–O(3)  | -86.5  | -86.5  | -83.7  |

---

Table S2: The topological properties of electron density of estrogens. First line: QM/MM minimized structure, Second line: Experimental, Third line: Gas phase.

| Bonds       | Estrone         |                         | Bonds       | 17 $\beta$ -Estradiol |                         | Bonds      | Estriol         |                         |
|-------------|-----------------|-------------------------|-------------|-----------------------|-------------------------|------------|-----------------|-------------------------|
|             | $\rho_{bcp}(r)$ | $\nabla^2\rho_{bcp}(r)$ |             | $\rho_{bcp}(r)$       | $\nabla^2\rho_{bcp}(r)$ |            | $\rho_{bcp}(r)$ | $\nabla^2\rho_{bcp}(r)$ |
| C(1)–C(2)   | 2.097           | -20.9                   | C(1)–C(2)   | 2.097                 | -20.8                   | C(1)–C(2)  | 2.13            | -21.5                   |
| EXP         | 2.146           | -17.7                   | EXP         | 2.165                 | -19.1                   | EXP A      | 2.125           | -18.7                   |
| GP          | 2.101           | -20.9                   | GP          | 2.1                   | -20.9                   | B          | 2.165           | -20.3                   |
| C(2)–C(3)   | 2.064           | -20.1                   | C(2)–C(3)   | 2.073                 | -20.3                   | GP         | 2.1             | -20.9                   |
|             | 2.053           | -17.0                   |             | 2.134                 | -19.0                   | C(2)–C(3)  | 2.048           | -19.8                   |
|             | 2.048           | -19.8                   |             | 2.049                 | -19.8                   |            | 2.065           | -17.7                   |
| C(3)–C(4)   | 2.047           | -19.6                   | C(3)–C(4)   | 2.056                 | -19.8                   |            | 2.107           | -18.3                   |
|             | 2.101           | -18.7                   |             | 2.092                 | -17.2                   |            | 2.048           | -19.8                   |
|             | 2.039           | -19.4                   |             | 2.039                 | -19.4                   | C(3)–C(4)  | 2.062           | -19.9                   |
| C(4)–C(5)   | 2.078           | -20.4                   | C(4)–C(5)   | 2.075                 | -20.3                   |            | 2.122           | -18.5                   |
|             | 2.146           | -18.7                   |             | 2.086                 | -16.7                   |            | 2.101           | -17.8                   |
|             | 2.057           | -20.0                   |             | 2.057                 | -20.0                   |            | 2.039           | -19.4                   |
| C(5)–C(6)   | 2.085           | -20.8                   | C(5)–C(6)   | 2.08                  | -20.6                   | C(4)–C(5)  | 2.077           | -20.4                   |
|             | 2.13            | -19.1                   |             | 2.21                  | -18.7                   |            | 2.145           | -19.2                   |
|             | 2.111           | -21.2                   |             | 2.111                 | -21.2                   |            | 2.072           | -18.0                   |
| C(1)–C(6)   | 2.056           | -20.2                   | C(1)–C(6)   | 2.057                 | -20.1                   |            | 2.058           | -20.0                   |
|             | 2.152           | -19.3                   |             | 2.195                 | -18.7                   | C(5)–C(6)  | 2.107           | -21.2                   |
|             | 2.108           | -21.4                   |             | 2.108                 | -21.4                   |            | 2.194           | -20.9                   |
| C(3)–C(7)   | 1.711           | -14.5                   | C(3)–C(7)   | 1.717                 | -14.6                   |            | 2.189           | -20.2                   |
|             | 1.7             | -10.6                   |             | 1.621                 | -9.0                    |            | 2.111           | -21.2                   |
|             | 1.635           | -13.1                   |             | 1.634                 | -13.1                   | C(1)–C(6)  | 2.061           | -20.3                   |
| C(7)–C(8)   | 1.604           | -12.5                   | C(7)–C(8)   | 1.607                 | -12.5                   |            | 2.204           | -21.4                   |
|             | 1.598           | -8.7                    |             | 1.601                 | -8.5                    |            | 2.138           | -19.5                   |
|             | 1.585           | -12.1                   |             | 1.589                 | -12.2                   |            | 2.109           | -21.4                   |
| C(8)–C(9)   | 1.68            | -13.8                   | C(8)–C(9)   | 1.681                 | -13.9                   | C(3)–C(7)  | 1.736           | -14.9                   |
|             | 1.684           | -10.4                   |             | 1.625                 | -9.0                    |            | 1.661           | -10.5                   |
|             | 1.639           | -13.1                   |             | 1.638                 | -13.1                   |            | 1.671           | -10.9                   |
| C(9)–C(10)  | 1.684           | -14.0                   | C(9)–C(10)  | 1.684                 | -14.0                   |            | 1.635           | -13.1                   |
|             | 1.672           | -10.0                   |             | 1.643                 | -9.2                    | C(7)–C(8)  | 1.615           | -12.7                   |
|             | 1.635           | -13.2                   |             | 1.635                 | -13.2                   |            | 1.554           | -8.5                    |
| C(4)–C(10)  | 1.749           | -15.3                   | C(4)–C(10)  | 1.754                 | -15.4                   |            | 1.565           | -8.7                    |
|             | 1.681           | -11.1                   |             | 1.711                 | -10.6                   |            | 1.588           | -12.2                   |
|             | 1.674           | -13.9                   |             | 1.674                 | -13.9                   | C(8)–C(9)  | 1.679           | -13.8                   |
| C(7)–C(11)  | 1.629           | -13.0                   | C(7)–C(11)  | 1.628                 | -12.9                   |            | 1.619           | -9.5                    |
|             | 1.652           | -9.9                    |             | 1.612                 | -8.8                    |            | 1.659           | -10.9                   |
|             | 1.586           | -12.2                   |             | 1.59                  | -12.3                   |            | 1.638           | -13.1                   |
| C(11)–C(12) | 1.62            | -12.9                   | C(11)–C(12) | 1.63                  | -13.0                   | C(9)–C(10) | 1.674           | -13.9                   |
|             | 1.607           | -9.1                    |             | 1.586                 | -9.1                    |            | 1.634           | -10.3                   |
|             | 1.59            | -12.4                   |             | 1.593                 | -12.4                   |            | 1.631           | -10.7                   |
| C(12)–C(13) | 1.644           | -13.2                   | C(12)–C(13) | 1.643                 | -13.1                   |            | 1.635           | -13.2                   |
|             | 1.657           | -10.2                   |             | 1.672                 | -10.4                   | C(4)–C(10) | 1.746           | -15.2                   |

|             |       |       |             |       |       |             |       |       |
|-------------|-------|-------|-------------|-------|-------|-------------|-------|-------|
|             | 1.639 | -13.1 |             | 1.632 | -13.0 |             | 1.699 | -11.4 |
| C(13)–C(14) | 1.6   | -12.2 | C(13)–C(14) | 1.607 | -12.4 |             | 1.676 | -10.5 |
|             | 1.606 | -9.1  |             | 1.597 | -8.5  |             | 1.675 | -13.9 |
|             | 1.606 | -12.3 |             | 1.605 | -12.3 | C(7)–C(11)  | 1.639 | -13.1 |
| C(14)–C(8)  | 1.678 | -13.7 | C(14)–C(8)  | 1.682 | -13.8 |             | 1.534 | -8.7  |
|             | 1.691 | -11.1 |             | 1.616 | -9.3  |             | 1.613 | -9.2  |
|             | 1.651 | -13.3 |             | 1.651 | -13.3 |             | 1.589 | -12.3 |
| C(13)–C(15) | 1.59  | -12.2 | C(13)–C(15) | 1.598 | -12.3 | C(11)–C(12) | 1.647 | -13.3 |
|             | 1.759 | -12.0 |             | 1.585 | -8.6  |             | 1.587 | -8.8  |
|             | 1.691 | -13.8 |             | 1.652 | -13.3 |             | 1.572 | -8.9  |
| C(15)–C(16) | 1.599 | -12.4 | C(15)–C(16) | 1.607 | -12.6 |             | 1.59  | -12.4 |
|             | 1.687 | -10.5 |             | 1.638 | -8.5  | C(12)–C(13) | 1.655 | -13.3 |
|             | 1.645 | -13.1 |             | 1.601 | -12.4 |             | 1.63  | -10.6 |
| C(16)–C(17) | 1.629 | -13.0 | C(16)–C(17) | 1.624 | -12.9 |             | 1.642 | -10.3 |
|             | 1.56  | -8.2  |             | 1.518 | -7.5  |             | 1.631 | -12.9 |
|             | 1.583 | -12.2 |             | 1.546 | -11.6 | C(13)–C(14) | 1.611 | -12.4 |
| C(14)–C(17) | 1.643 | -13.1 | C(14)–C(17) | 1.647 | -13.2 |             | 1.622 | -10.1 |
|             | 1.62  | -9.2  |             | 1.59  | -8.1  |             | 1.602 | -8.9  |
|             | 1.601 | -12.3 |             | 1.6   | -12.4 |             | 1.598 | -12.2 |
| C(13)–C(18) | 1.625 | -12.9 | C(13)–C(18) | 1.625 | -12.9 | C(14)–C(8)  | 1.676 | -13.7 |
|             | 1.553 | -8.5  |             | 1.637 | -9.7  |             | 1.727 | -11.6 |
|             | 1.546 | -11.5 |             | 1.585 | -12.2 |             | 1.706 | -11.5 |
| C(6)–O(1)   | 1.916 | -9.3  | C(6)–O(1)   | 1.922 | -9.3  |             | 1.652 | -13.3 |
|             | 2.036 | -15.9 |             | 2.065 | -17.9 | C(13)–C(15) | 1.62  | -12.6 |
|             | 1.908 | -9.0  |             | 1.904 | -9.0  |             | 1.685 | -11.7 |
| C(15)–O(2)  | 2.771 | 1.1   | C(15)–O(2)  | 1.804 | -12.0 |             | 1.65  | -10.5 |
|             | 2.856 | -17.6 |             | 1.654 | -5.2  |             | 1.631 | -12.8 |
|             | 2.781 | 0.3   |             | 1.707 | -11.6 | C(15)–C(16) | 1.597 | -12.4 |
| C(1)–H(1)   | 1.843 | -21.9 | C(1)–H(1)   | 1.838 | -21.8 |             | 1.655 | -10.7 |
|             | 1.843 | -16.8 |             | 1.895 | -18.2 |             | 1.69  | -11.3 |
|             | 1.897 | -23.2 |             | 1.896 | -23.1 |             | 1.685 | -14.0 |
| C(2)–H(2)   | 1.822 | -21.4 | C(2)–H(2)   | 1.821 | -21.2 | C(16)–C(17) | 1.613 | -12.8 |
|             | 1.916 | -18.6 |             | 1.87  | -18.4 |             | 1.565 | -9.3  |
|             | 1.911 | -23.5 |             | 1.911 | -23.5 |             | 1.596 | -9.6  |
| C(5)–H(5)   | 1.809 | -21.1 | C(5)–H(5)   | 1.807 | -21.0 |             | 1.617 | -12.9 |
|             | 1.867 | -17.7 |             | 1.771 | -15.6 | C(14)–C(17) | 1.657 | -13.3 |
|             | 1.862 | -22.3 |             | 1.861 | -22.2 |             | 1.595 | -8.6  |
| C(7)–H(7)   | 1.719 | -18.7 | C(7)–H(7)   | 1.719 | -18.7 |             | 1.557 | -8.6  |
|             | 1.772 | -14.9 |             | 1.832 | -16.4 |             | 1.598 | -12.3 |
|             | 1.835 | -21.4 |             | 1.833 | -21.3 | C(13)–C(18) | 1.626 | -12.9 |
| C(8)–H(8)   | 1.756 | -19.6 | C(8)–H(8)   | 1.754 | -19.6 |             | 1.591 | -10.4 |
|             | 1.783 | -15.2 |             | 1.773 | -15.8 |             | 1.605 | -10.5 |
|             | 1.848 | -21.7 |             | 1.849 | -21.7 |             | 1.588 | -12.2 |
| C(9)–H(9A)  | 1.774 | -20.0 | C(9)–H(9A)  | 1.774 | -20.0 | C(6)–O(1)   | 1.955 | -10.8 |
|             | 1.819 | -14.7 |             | 1.935 | -17.6 |             | 2.033 | -20.3 |
|             | 1.858 | -22.0 |             | 1.858 | -22.0 |             | 2.033 | -19.9 |

|              |       |       |              |       |       |              |       |       |
|--------------|-------|-------|--------------|-------|-------|--------------|-------|-------|
| C(9)–H(9B)   | 1.795 | -20.5 | C(9)–H(9B)   | 1.799 | -20.6 |              | 2.485 | -60.7 |
|              | 1.77  | -14.4 |              | 1.833 | -15.9 | C(15)–O(2)   | 1.764 | -9.9  |
|              | 1.844 | -21.7 |              | 1.843 | -21.6 |              | 1.849 | -13.9 |
| C(10)–H(10A) | 1.759 | -19.7 | C(10)–H(10A) | 1.763 | -19.8 |              | 1.774 | -12.6 |
|              | 1.841 | -17.1 |              | 1.876 | -15.3 |              | 1.693 | -11.0 |
|              | 1.854 | -21.9 |              | 1.852 | -21.9 | C(16)–O(3)   | 1.745 | -10.1 |
| C(10)–H(10B) | 1.79  | -20.4 | C(10)–H(10B) | 1.787 | -20.4 |              | 1.73  | -10.0 |
|              | 1.847 | -16.8 |              | 1.681 | -11.6 |              | 1.632 | -8.1  |
|              | 1.836 | -21.5 |              | 1.836 | -21.5 |              | 1.714 | -12.2 |
| C(11)–H(11A) | 1.8   | -20.6 | C(11)–H(11A) | 1.799 | -20.6 | C(1)–H(1)    | 1.788 | -20.7 |
|              | 1.808 | -15.9 |              | 1.805 | -16.0 |              | 1.896 | -17.2 |
|              | 1.855 | -21.9 |              | 1.856 | -21.9 |              | 1.851 | -16.6 |
| C(11)–H(11B) | 1.797 | -20.6 | C(11)–H(11B) | 1.791 | -20.4 |              | 1.896 | -23.1 |
|              | 1.819 | -16.7 |              | 1.876 | -17.0 | C(2)–H(2)    | 1.809 | -20.9 |
|              | 1.866 | -22.1 |              | 1.863 | -22.1 |              | 1.845 | -16.4 |
| C(12)–H(12A) | 1.779 | -20.1 | C(12)–H(12A) | 1.777 | -20.1 |              | 1.871 | -16.3 |
|              | 1.844 | -15.4 |              | 1.803 | -15.2 |              | 1.91  | -23.4 |
|              | 1.851 | -21.8 |              | 1.839 | -21.5 | C(5)–H(5)    | 1.834 | -21.5 |
| C(12)–H(12B) | 1.793 | -20.5 | C(12)–H(12B) | 1.793 | -20.5 |              | 1.908 | -17.2 |
|              | 1.815 | -14.9 |              | 1.83  | -15.9 |              | 1.834 | -15.7 |
|              | 1.863 | -22.1 |              | 1.858 | -22.0 |              | 1.862 | -22.2 |
| C(14)–H(14)  | 1.754 | -19.5 | C(14)–H(14)  | 1.747 | -19.4 | C(7)–H(7)    | 1.748 | -19.4 |
|              | 1.81  | -15.9 |              | 1.857 | -16.9 |              | 1.762 | -14.8 |
|              | 1.838 | -21.4 |              | 1.838 | -21.4 |              | 1.787 | -15.6 |
| C(16)–H(16A) | 1.8   | -20.6 | C(15)–H(15)  | 1.786 | -20.2 |              | 1.835 | -21.3 |
|              | 1.774 | -13.7 |              | 2.007 | -20.7 | C(8)–H(8)    | 1.778 | -20.2 |
|              | 1.846 | -21.8 |              | 1.884 | -22.6 |              | 1.839 | -16.5 |
| C(16)–H(16B) | 1.781 | -20.2 | C(16)–H(16A) | 1.803 | -20.7 |              | 1.766 | -15.8 |
|              | 1.779 | -13.7 |              | 1.889 | -16.8 |              | 1.847 | -21.6 |
|              | 1.839 | -21.6 |              | 1.854 | -21.9 | C(9)–H(9A)   | 1.786 | -20.3 |
| C(17)–H(17A) | 1.786 | -20.2 | C(16)–H(16B) | 1.801 | -20.7 |              | 1.836 | -16.9 |
|              | 1.769 | -14.1 |              | 1.764 | -14.7 |              | 1.837 | -15.6 |
|              | 1.868 | -22.2 |              | 1.862 | -22.0 |              | 1.86  | -22.0 |
| C(17)–H(17B) | 1.779 | -20.2 | C(17)–H(17A) | 1.788 | -20.3 | C(9)–H(9B)   | 1.778 | -20.1 |
|              | 1.789 | -14.8 |              | 1.857 | -15.6 |              | 1.837 | -17.0 |
|              | 1.858 | -22.0 |              | 1.865 | -22.2 |              | 1.78  | -14.1 |
| C(18)–H(18A) | 1.804 | -20.7 | C(17)–H(17B) | 1.779 | -20.2 |              | 1.844 | -21.7 |
|              | 1.817 | -14.8 |              | 1.722 | -13.1 | C(10)–H(10A) | 1.746 | -19.3 |
|              | 1.855 | -21.9 |              | 1.857 | -21.9 |              | 1.7   | -12.1 |
| C(18)–H(18B) | 1.822 | -21.2 | C(18)–H(18A) | 1.803 | -20.6 |              | 1.829 | -15.5 |
|              | 1.792 | -14.7 |              | 1.886 | -15.1 |              | 1.853 | -21.9 |
|              | 1.851 | -21.8 |              | 1.865 | -22.2 | C(10)–H(10B) | 1.774 | -20.0 |
| C(18)–H(18C) | 1.791 | -20.4 | C(18)–H(18B) | 1.786 | -20.3 |              | 1.824 | -14.0 |
|              | 1.791 | -13.8 |              | 1.924 | -15.3 |              | 1.771 | -14.9 |
|              | 1.859 | -22.0 |              | 1.856 | -21.9 |              | 1.836 | -21.5 |
| O(1)–H(6)    | 2.35  | -60.5 | C(18)–H(18C) | 1.818 | -21.1 | C(11)–H(11A) | 1.775 | -19.9 |

|       |       |           |       |       |              |       |       |
|-------|-------|-----------|-------|-------|--------------|-------|-------|
| 2.656 | -48.4 |           | 1.805 | -13.8 |              | 1.805 | -15.4 |
| 2.485 | -60.7 |           | 1.849 | -21.8 |              | 1.669 | -11.8 |
|       |       | O(1)–H(6) | 2.344 | -60.4 |              | 1.857 | -21.9 |
|       |       |           | 2.595 | -51.8 | C(11)–H(11B) | 1.787 | -20.3 |
|       |       |           | 2.486 | -60.7 |              | 1.744 | -14.1 |
|       |       | O(2)–H(3) | 2.522 | -64.4 |              | 1.789 | -13.8 |
|       |       |           | 2.797 | -59.9 |              | 1.864 | -22.1 |
|       |       |           | 2.493 | -59.6 | C(12)–H(12A) | 1.803 | -20.8 |
|       |       |           |       |       |              | 1.791 | -13.6 |
|       |       |           |       |       |              | 1.795 | -13.4 |
|       |       |           |       |       |              | 1.839 | -21.5 |
|       |       |           |       |       | C(12)–H(12B) | 1.805 | -20.8 |
|       |       |           |       |       |              | 1.788 | -13.3 |
|       |       |           |       |       |              | 1.671 | -11.1 |
|       |       |           |       |       |              | 1.841 | -21.6 |
|       |       |           |       |       | C(14)–H(14)  | 1.731 | -19.0 |
|       |       |           |       |       |              | 1.849 | -17.0 |
|       |       |           |       |       |              | 1.816 | -16.3 |
|       |       |           |       |       |              | 1.846 | -21.5 |
|       |       |           |       |       | C(16)–H(16)  | 1.843 | -21.7 |
|       |       |           |       |       |              | 1.894 | -21.5 |
|       |       |           |       |       |              | 1.933 | -22.9 |
|       |       |           |       |       |              | 1.902 | -23.0 |
|       |       |           |       |       | C(17)–H(17A) | 1.796 | -20.5 |
|       |       |           |       |       |              | 1.851 | -19.9 |
|       |       |           |       |       |              | 1.854 | -20.0 |
|       |       |           |       |       |              | 1.872 | -22.3 |
|       |       |           |       |       | C(17)–H(17B) | 1.784 | -20.2 |
|       |       |           |       |       |              | 1.845 | -19.2 |
|       |       |           |       |       |              | 1.86  | -20.5 |
|       |       |           |       |       |              | 1.855 | -21.9 |
|       |       |           |       |       | C(18)–H(18A) | 1.783 | -20.1 |
|       |       |           |       |       |              | 1.903 | -21.2 |
|       |       |           |       |       |              | 1.913 | -21.8 |
|       |       |           |       |       |              | 1.856 | -21.9 |
|       |       |           |       |       | C(18)–H(18B) | 1.813 | -20.9 |
|       |       |           |       |       |              | 1.912 | -21.4 |
|       |       |           |       |       |              | 1.939 | -22.6 |
|       |       |           |       |       |              | 1.851 | -21.8 |
|       |       |           |       |       | C(18)–H(18C) | 1.825 | -21.2 |
|       |       |           |       |       |              | 1.891 | -21.0 |
|       |       |           |       |       |              | 1.901 | -20.7 |
|       |       |           |       |       |              | 1.858 | -22.0 |
|       |       |           |       |       | O(1)–H(6)    | 2.353 | -59.1 |
|       |       |           |       |       |              | 2.099 | -31.2 |
|       |       |           |       |       |              | 2.033 | -34.2 |

|           |       |       |
|-----------|-------|-------|
|           | 2.485 | -60.7 |
| O(2)–H(4) | 2.479 | -61.4 |
|           | 2.284 | -37.7 |
|           | 2.326 | -39.1 |
|           | 2.491 | -59.7 |
| O(3)–H(3) | 2.545 | -63.0 |
|           | 2.187 | -32.2 |
|           | 2.396 | -43.5 |
|           | 2.484 | -59.5 |

---

Table S3: Atomic charges and Volumes of estrogens for QM/MM minimized and gas phase molecule.

| Atoms | 17 $\beta$ -Estradiol |       |       |        |       |       | Atoms | Estriol   |       |       |        |       |       | Atoms | Estrone   |       |       |        |       |       |
|-------|-----------------------|-------|-------|--------|-------|-------|-------|-----------|-------|-------|--------|-------|-------|-------|-----------|-------|-------|--------|-------|-------|
|       | Gas Phase             |       |       | QM/MM  |       |       |       | Gas Phase |       |       | QM/MM  |       |       |       | Gas Phase |       |       | QM/MM  |       |       |
|       | MPA                   | AIM   | V     | MPA    | AIM   | V     |       | MPA       | AIM   | V     | MPA    | AIM   | V     |       | MPA       | AIM   | V     | MPA    | AIM   | V     |
| O(1)  | -0.366                | -1.07 | 17.09 | -0.466 | -1.19 | 17.19 | O(1)  | -0.366    | -1.07 | 17.09 | -0.386 | -1.15 | 17.21 | O(1)  | -0.365    | -1.07 | 19.41 | -0.469 | -1.18 | 17.04 |
| O(2)  | -0.409                | -1.06 | 16.79 | -0.422 | -0.96 | 16.98 | O(2)  | -0.413    | -1.06 | 16.86 | -0.426 | -1.12 | 16.95 | O(2)  | -0.297    | -1.11 | 17.08 | -0.263 | -0.88 | 16.84 |
| C(1)  | -0.085                | -0.01 | 12.35 | -0.168 | -0.06 | 12.68 | O(3)  | -0.409    | -1.05 | 16.97 | -0.392 | -1.07 | 16.27 | C(1)  | -0.084    | -0.01 | 12.33 | -0.152 | -0.03 | 12.03 |
| C(2)  | -0.068                | -0.01 | 11.96 | -0.094 | -0.03 | 12.15 | C(1)  | -0.085    | -0.01 | 12.35 | -0.154 | 0.02  | 12.68 | C(2)  | -0.068    | -0.01 | 11.96 | -0.068 | -0.03 | 12.33 |
| C(3)  | -0.016                | -0.02 | 10.45 | -0.018 | -0.02 | 10.96 | C(2)  | -0.068    | -0.01 | 11.97 | -0.117 | -0.02 | 12.01 | C(3)  | -0.018    | -0.03 | 10.46 | -0.024 | -0.02 | 10.62 |
| C(4)  | -0.076                | -0.01 | 10.26 | -0.064 | -0.02 | 10.49 | C(3)  | -0.018    | -0.02 | 10.45 | 0.011  | -0.01 | 10.96 | C(4)  | -0.076    | -0.01 | 10.25 | -0.111 | -0.01 | 10.43 |
| C(5)  | -0.113                | -0.03 | 12.26 | -0.105 | -0.02 | 13.62 | C(4)  | -0.076    | -0.01 | 10.24 | -0.099 | 0.01  | 10.49 | C(5)  | -0.113    | -0.03 | 12.26 | -0.082 | -0.03 | 12.38 |
| C(6)  | 0.164                 | 0.49  | 9.02  | 0.183  | 0.5   | 9.12  | C(5)  | -0.113    | -0.03 | 12.25 | -0.119 | -0.02 | 13.62 | C(6)  | 0.165     | 0.49  | 9.01  | 0.186  | 0.5   | 9.13  |
| C(7)  | -0.158                | 0.05  | 7.1   | -0.178 | 0.03  | 6.89  | C(6)  | 0.165     | 0.49  | 9.02  | 0.108  | 0.52  | 9.12  | C(7)  | -0.159    | 0.05  | 7.12  | -0.168 | 0.03  | 6.94  |
| C(8)  | -0.148                | 0.05  | 6.79  | -0.147 | 0.04  | 6.75  | C(7)  | -0.157    | 0.05  | 7.11  | -0.186 | 0.04  | 6.88  | C(8)  | -0.15     | 0.05  | 6.85  | -0.145 | 0.04  | 6.72  |
| C(9)  | -0.169                | 0.05  | 8.28  | -0.203 | 0.03  | 8.34  | C(8)  | -0.147    | 0.05  | 6.82  | -0.142 | 0.04  | 6.73  | C(9)  | -0.17     | 0.05  | 8.29  | -0.2   | 0.02  | 8.17  |
| C(10) | -0.175                | 0.05  | 8.57  | -0.165 | 0.08  | 8.46  | C(9)  | -0.168    | 0.05  | 8.31  | -0.218 | 0.03  | 8.46  | C(10) | -0.177    | 0.05  | 8.56  | -0.161 | 0.04  | 8.42  |
| C(11) | -0.185                | 0.04  | 8.12  | -0.187 | 0.02  | 8.17  | C(10) | -0.175    | 0.05  | 8.58  | -0.164 | 0.02  | 8.47  | C(11) | -0.186    | 0.04  | 8.15  | -0.184 | 0.04  | 8.9   |
| C(12) | -0.113                | 0.04  | 7.74  | -0.134 | 0.03  | 7.81  | C(11) | -0.185    | 0     | 8.36  | -0.189 | 0.02  | 8.08  | C(12) | -0.108    | 0.05  | 8.16  | -0.144 | 0.02  | 8.18  |
| C(13) | -0.292                | 0.06  | 7.01  | -0.299 | 0.05  | 6.11  | C(12) | -0.124    | 0.03  | 8.27  | -0.109 | 0.03  | 8.15  | C(13) | -0.31     | 0.02  | 6.3   | -0.282 | 0.04  | 6.49  |
| C(14) | -0.163                | 0.04  | 6.71  | -0.175 | 0.03  | 6.67  | C(13) | -0.311    | 0.04  | 7.08  | -0.362 | 0.04  | 6.02  | C(14) | -0.155    | 0.04  | 6.76  | -0.177 | 0.03  | 6.67  |
| C(15) | 0.125                 | 0.49  | 6.26  | 0.134  | 0.53  | 6.3   | C(14) | -0.18     | 0.04  | 6.75  | -0.189 | 0.02  | 6.61  | C(15) | 0.262     | 0.99  | 6.61  | 0.113  | 0.72  | 6.15  |
| C(16) | -0.211                | 0.02  | 8.86  | -0.218 | 0.01  | 8.84  | C(15) | 0.132     | 0.47  | 6.1   | 0.111  | 0.48  | 6.17  | C(16) | -0.222    | -0.02 | 9.29  | -0.225 | -0.01 | 8.77  |
| C(17) | -0.151                | 0.03  | 8.6   | -0.167 | 0.01  | 8.4   | C(16) | 0.038     | 0.5   | 6.31  | 0.028  | 0.49  | 6.38  | C(17) | -0.17     | 0.03  | 8.64  | -0.17  | 0.01  | 8.41  |
| C(18) | -0.215                | 0.01  | 9.43  | -0.214 | 0     | 9.36  | C(17) | -0.112    | 0.03  | 8.27  | -0.126 | 0.01  | 8.39  | C(18) | -0.229    | 0.01  | 9.65  | -0.213 | 0.01  | 9.48  |
| H(1)  | 0.096                 | 0.03  | 7.28  | 0.135  | 0.02  | 7.01  | C(18) | -0.206    | 0.01  | 9.47  | -0.211 | -0.01 | 9.34  | H(1)  | 0.098     | 0.03  | 7.27  | 0.13   | 0.06  | 6.79  |
| H(2)  | 0.084                 | 0.01  | 6.88  | 0.104  | 0.01  | 5.92  | H(1)  | 0.096     | 0.03  | 7.28  | 0.155  | 0.01  | 7.05  | H(2)  | 0.085     | 0.01  | 6.87  | 0.094  | 0.03  | 7.04  |
| H(3)  | 0.235                 | 0.54  | 3.57  | 0.261  | 0.59  | 2.67  | H(2)  | 0.083     | 0.01  | 6.89  | 0.094  | 0     | 5.95  | H(5)  | 0.07      | -0.01 | 7.54  | 0.079  | 0.02  | 9.26  |
| H(5)  | 0.068                 | -0.01 | 7.55  | 0.084  | -0.01 | 7.74  | H(3)  | 0.238     | 0.54  | 3.61  | 0.245  | 0.55  | 3.15  | H(6)  | 0.245     | 0.56  | 3.44  | 0.302  | 0.64  | 1.6   |
| H(6)  | 0.244                 | 0.56  | 3.44  | 0.305  | 0.6   | 2.43  | H(4)  | 0.239     | 0.54  | 3.4   | 0.289  | 0.55  | 2.49  | H(7)  | 0.123     | -0.02 | 7.24  | 0.121  | -0.02 | 5.96  |
